# Supplementary material
Source: ML conference proceedings conference paper supplement (https://openaccess.thecvf.com/content/CVPR2025/html/Zhu_EntityErasure_Erasing_Entity_CVPR_2025_paper.html)
Supplement: Supplementary file 1 [file Zhu_EntityErasure_Erasing_Entity_CVPR_2025_supplemental.pdf]

# EntityErasure: Erasing Entity Cleanly via Amodal Entity Segmentation and Completion

## - Supplementary Material -

Yixing Zhu<sup>1</sup> Qing Zhang<sup>1,4\*</sup> Yitong Wang<sup>2</sup> Yongwei Nie<sup>3</sup> Wei-Shi Zheng<sup>1,4</sup>

<sup>1</sup>School of Computer Science and Engineering, Sun Yat-sen University, China

<sup>2</sup>ByteDance Inc <sup>3</sup>South China University of Technology, China

<sup>4</sup>Key Laboratory of Machine Intelligence and Advanced Computing, Ministry of Education, China

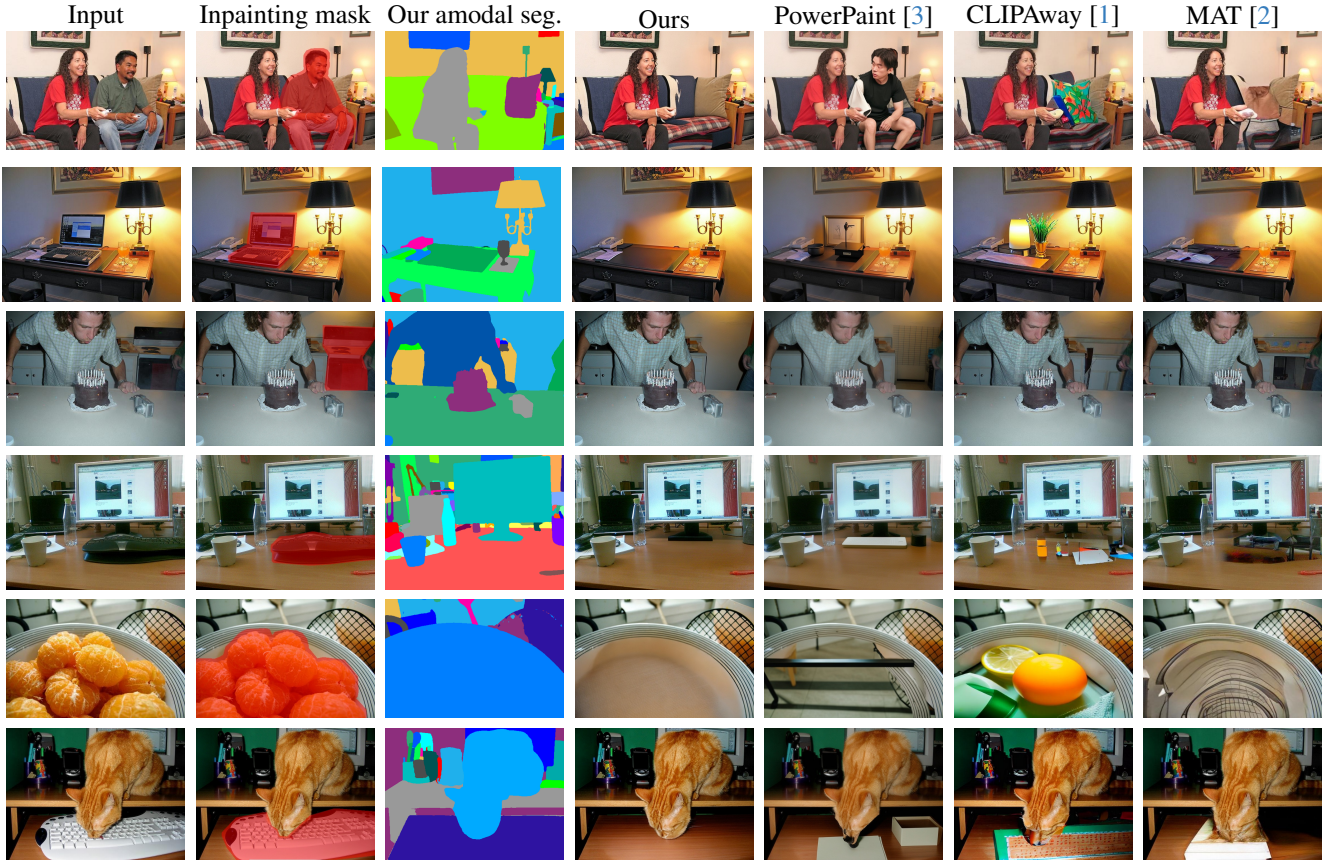

Figure 1. More Qualitative comparisons with state-of-the-art methods.

## 1. Comparison

In Figures 1, 2, 3, 4 and 5, we present more comparative results across various scenarios. It can be observed that our method effectively erases objects in these scenarios without generating unwanted sundries.

\*Corresponding author (zhangq93@mail.sysu.edu.cn).

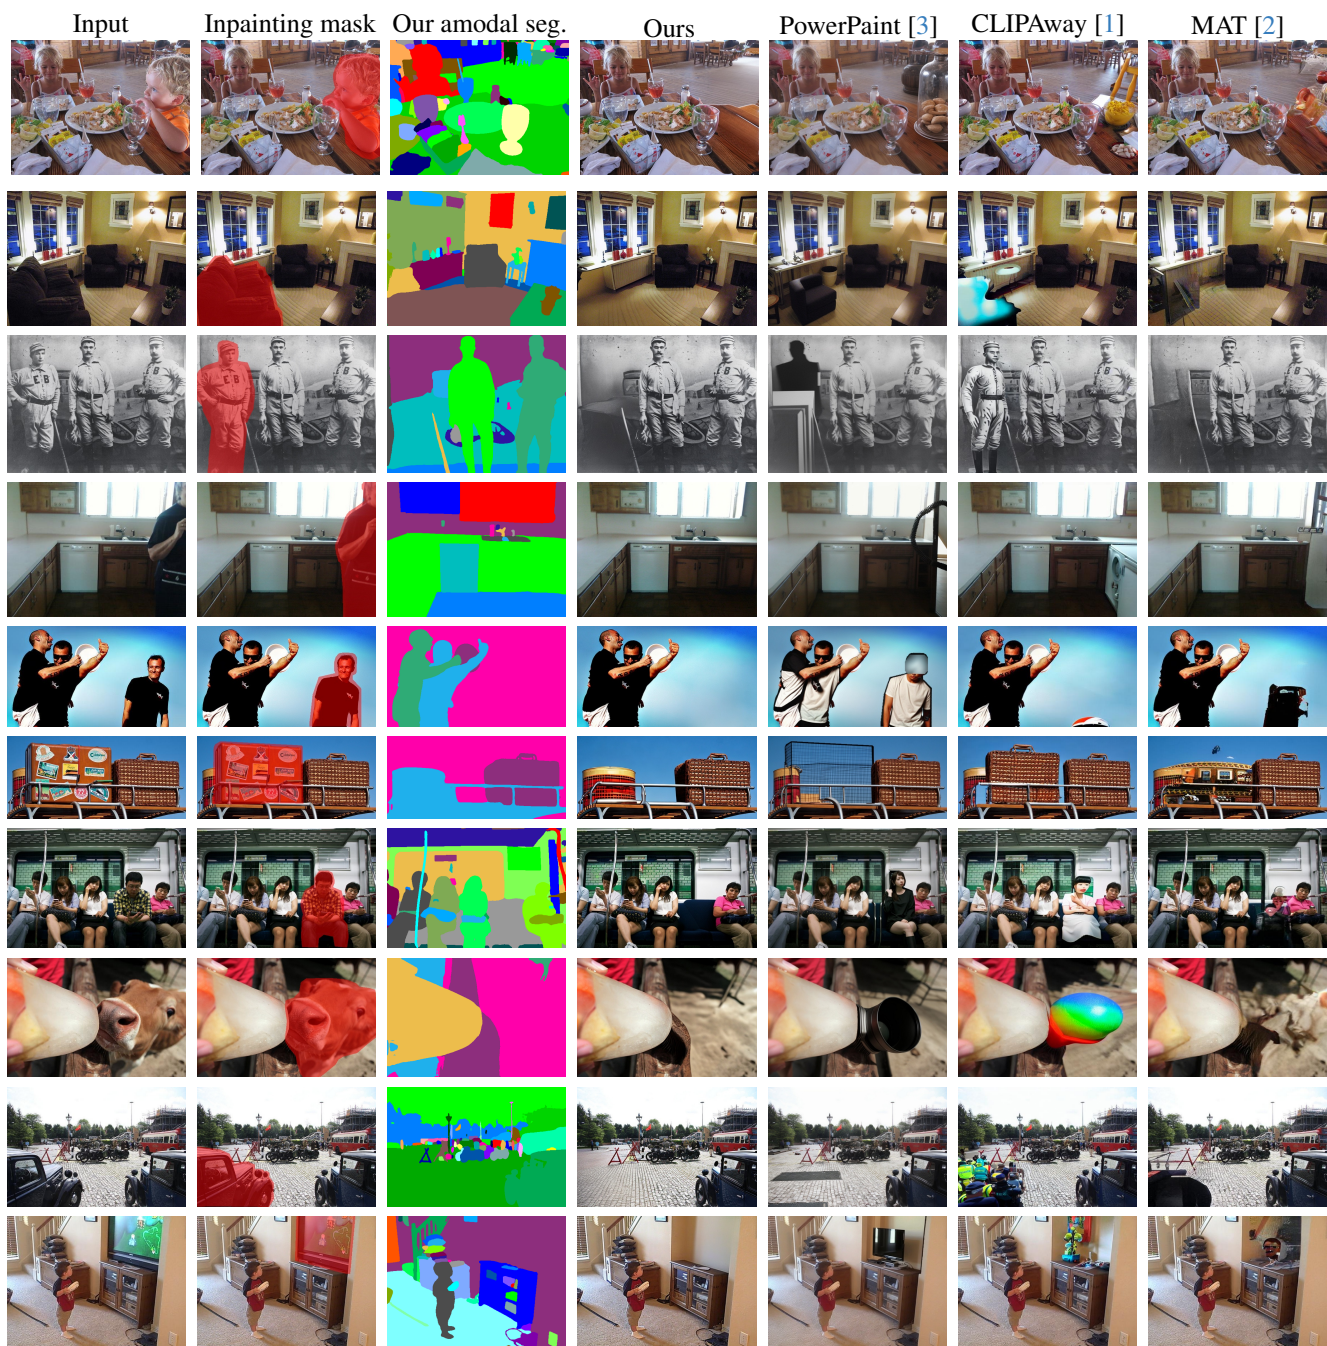

Figure 2. More Qualitative comparisons with state-of-the-art methods.



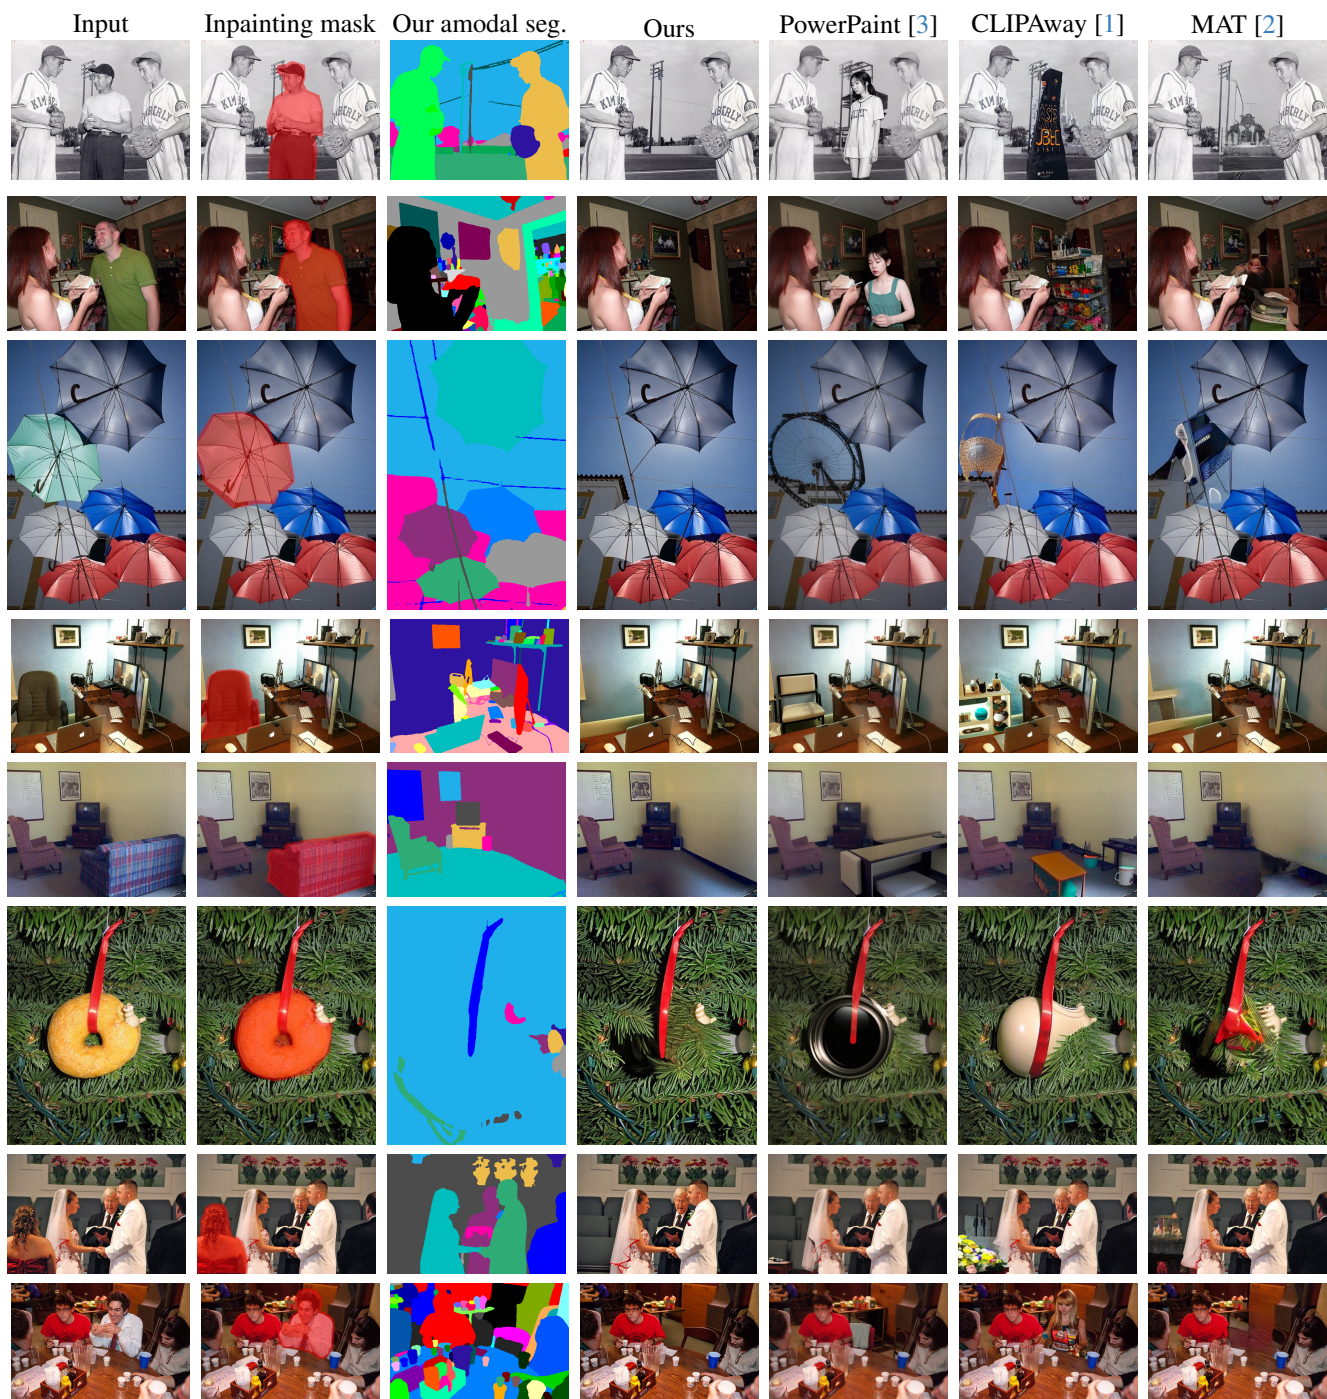

Figure 3. More Qualitative comparisons with state-of-the-art methods.



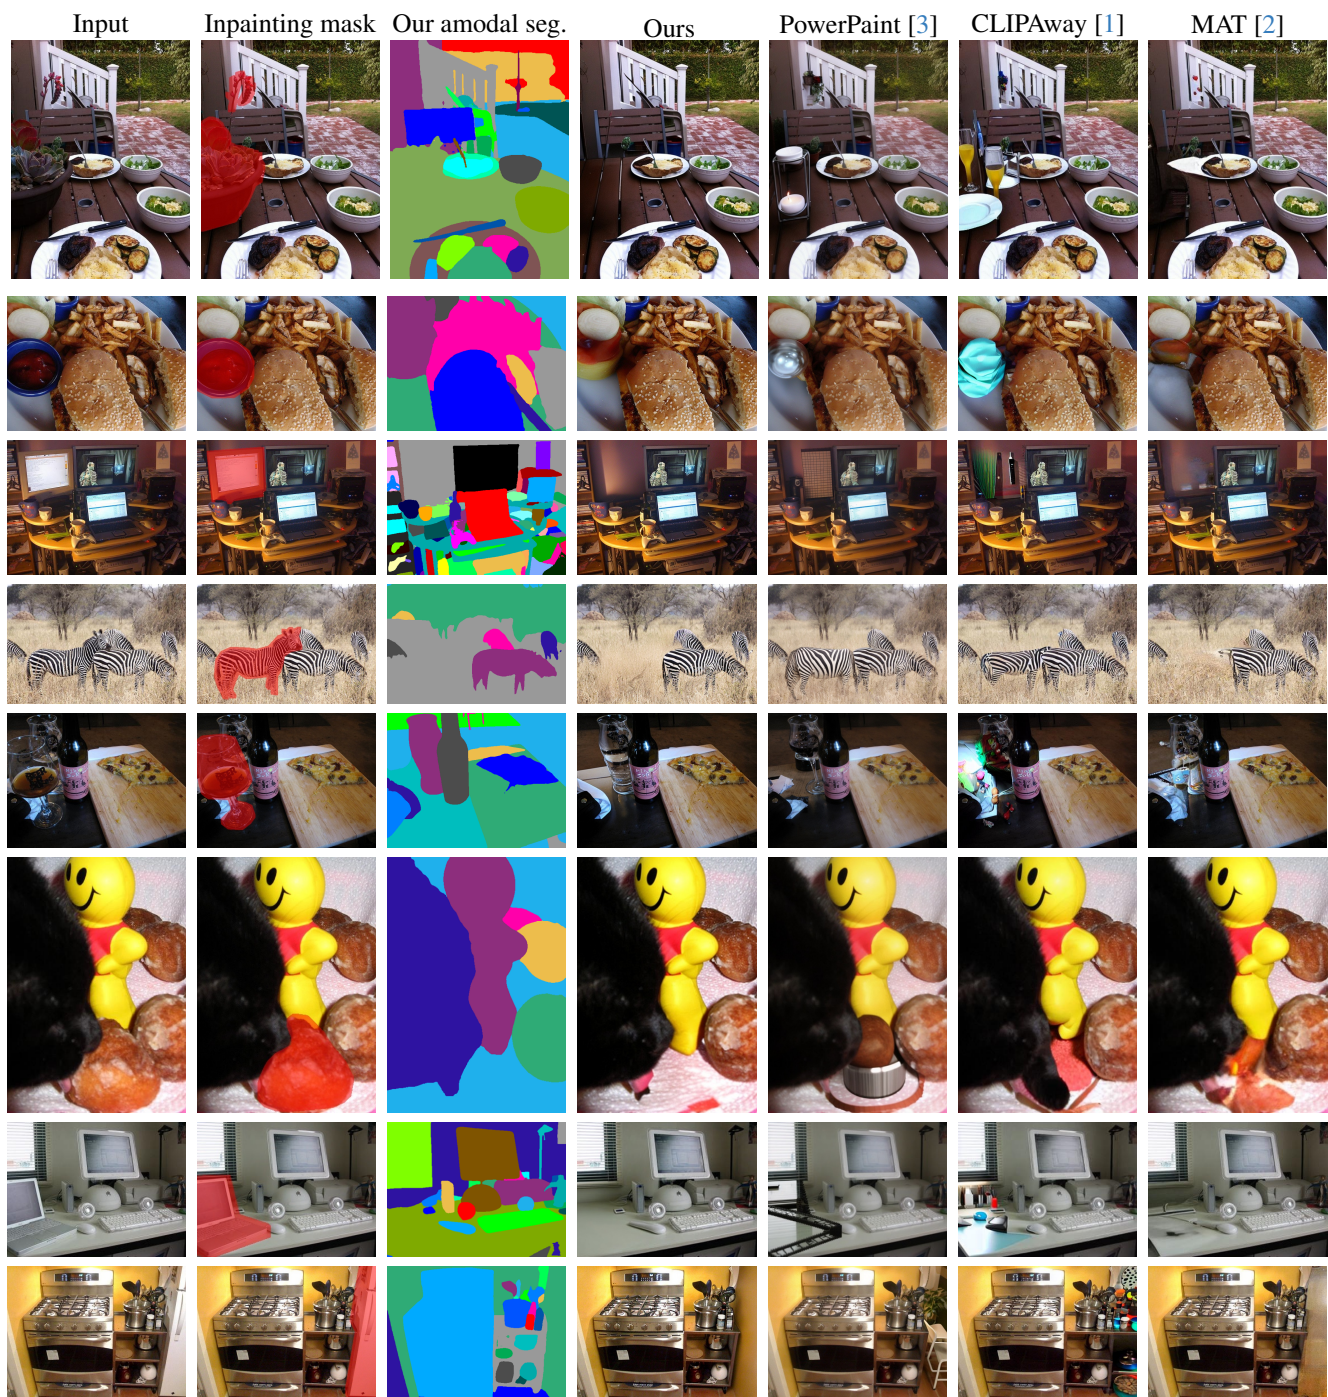

Figure 4. More Qualitative comparisons with state-of-the-art methods.



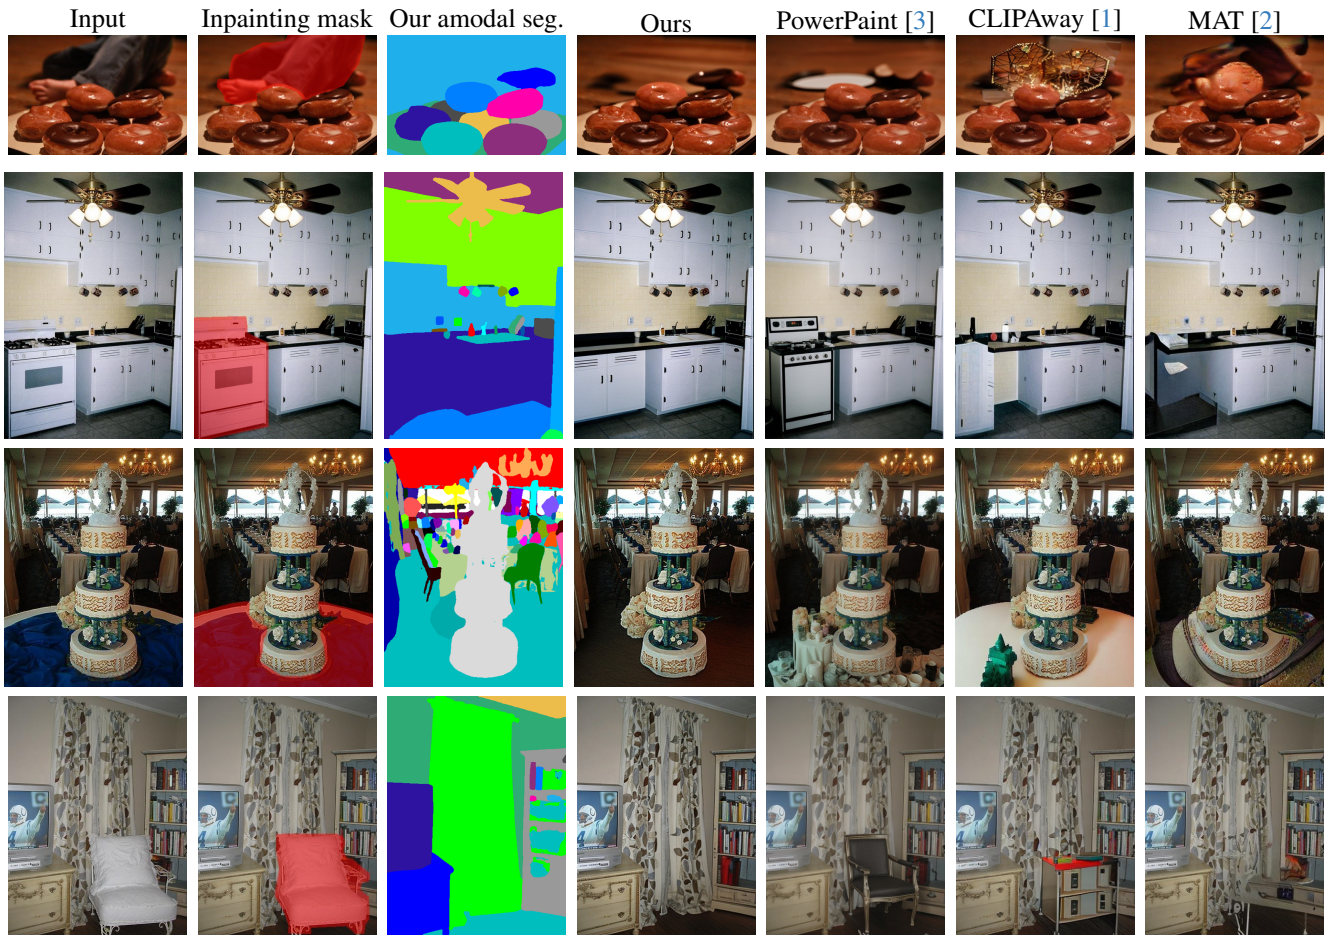

Figure 5. More Qualitative comparisons with state-of-the-art methods.

## 2. Limitations

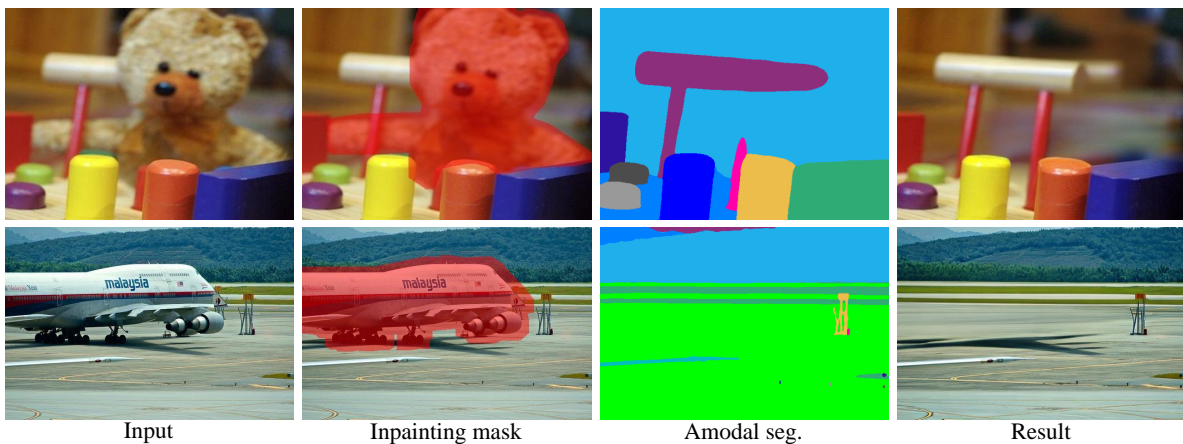

Figure 6. From top to bottom: result with poor amodal segmentation, result with shadow outside inpainting mask.

We show representative failure cases of our method in Fig. 6. If there are errors in the generated amodal segmentation, it will affect the generation of the final results of our model. The feasible solution is to adopt multi-task learning, using traditional amodal segmentation datasets in combination with erasure datasets to learn both tasks, thereby enhancing the



unified amodal segmentation ability. And our model cannot erase the shadow outside the inpainting area well. The feasible solution is to incorporate instance shadow detection.

## References

- [1] Yigit Ekin, Ahmet Burak Yildirim, Erdem Eren Caglar, Aykut Erdem, Erkut Erdem, and Aysegul Dunder. Clipaway: Harmonizing focused embeddings for removing objects via diffusion models. In *NeurIPS*, 2024. [1](#), [2](#), [3](#), [4](#), [5](#)
- [2] Wenbo Li, Zhe Lin, Kun Zhou, Lu Qi, Yi Wang, and Jiaya Jia. Mat: Mask-aware transformer for large hole image inpainting. In *CVPR*, 2022. [1](#), [2](#), [3](#), [4](#), [5](#)
- [3] Junhao Zhuang, Yanhong Zeng, Wenran Liu, Chun Yuan, and Kai Chen. A task is worth one word: Learning with task prompts for high-quality versatile image inpainting. In *ECCV*, 2024. [1](#), [2](#), [3](#), [4](#), [5](#)
